# Supplementary material for: Mendelian randomization analyses explore the relationship between cathepsins and lung cancer
Source: PubMed Central journal article supplement (PMC10560205; doi:10.1038/s42003-023-05408-7), 2023-10-07
Supplement: 42003_2023_5408_MOESM2_ESM.pdf [file 42003_2023_5408_MOESM2_ESM.pdf]

**Supplementary Table 1. Pleiotropy and heterogeneity analyses of Two-Sample MR between cathepsins family and different histological typ**

| exposure     | outcome             | MR-Egger intercept |         | MR-PRESSO global | MR-IWW |      |        | MR-Egger |      |        |
|--------------|---------------------|--------------------|---------|------------------|--------|------|--------|----------|------|--------|
|              |                     | Egger intercept    | p_value | p_value          | Q      | Q_df | Q_pval | Q        | Q_df | Q_pval |
| cathepsin B  | Overall lung cancer | -0.002             | 0.619   | 0.841            | 10.268 | 15   | 0.803  | 10.244   | 14   | 0.744  |
|              | Adenocarcinoma      | -0.019             | 0.278   | 0.595            | 12.638 | 14   | 0.555  | 13.915   | 15   | 0.532  |
|              | Squamous carcinoma  | 0.004              | 0.835   | 0.645            | 11.318 | 13   | 0.584  | 11.273   | 12   | 0.506  |
|              | SCLC                | 0.059              | 0.261   | 0.084            | 20.612 | 11   | 0.038  | 18.054   | 10   | 0.054  |
| cathepsin E  | Overall lung cancer | -0.004             | 0.751   | 0.820            | 5.254  | 9    | 0.812  | 5.146    | 8    | 0.742  |
|              | Adenocarcinoma      | -0.016             | 0.376   | 0.586            | 7.264  | 9    | 0.610  | 6.386    | 8    | 0.604  |
|              | Squamous carcinoma  | -0.012             | 0.658   | 0.473            | 7.815  | 8    | 0.452  | 7.583    | 7    | 0.371  |
|              | SCLC                | -0.037             | 0.299   | 0.299            | 12.465 | 9    | 0.188  | 10.797   | 8    | 0.213  |
| cathepsin F  | Overall lung cancer | -0.014             | 0.320   | 0.515            | 9.209  | 10   | 0.512  | 8.100    | 9    | 0.524  |
|              | Adenocarcinoma      | -0.026             | 0.284   | 0.173            | 15.529 | 10   | 0.114  | 13.573   | 9    | 0.138  |
|              | Squamous carcinoma  | -0.005             | 0.816   | 0.701            | 7.676  | 10   | 0.660  | 7.619    | 9    | 0.573  |
|              | SCLC                | -0.041             | 0.264   | 0.667            | 7.502  | 10   | 0.677  | 6.086    | 9    | 0.731  |
| cathepsin G  | Overall lung cancer | -0.001             | 0.967   | 0.309            | 12.134 | 10   | 0.276  | 12.131   | 9    | 0.206  |
|              | Adenocarcinoma      | -0.019             | 0.366   | 0.750            | 6.742  | 10   | 0.750  | 5.837    | 9    | 0.756  |
|              | Squamous carcinoma  | 0.003              | 0.908   | 0.399            | 9.894  | 9    | 0.359  | 9.876    | 8    | 0.274  |
|              | SCLC                | 0.021              | 0.674   | 0.074            | 17.291 | 10   | 0.068  | 16.936   | 9    | 0.050  |
| cathepsin H  | Overall lung cancer | -0.004             | 0.702   | 0.270            | 15.432 | 9    | 0.080  | 15.134   | 8    | 0.057  |
|              | Adenocarcinoma      | -0.007             | 0.603   | 0.433            | 10.420 | 9    | 0.318  | 10.052   | 8    | 0.261  |
|              | Squamous carcinoma  | 0.010              | 0.538   | 0.347            | 13.054 | 10   | 0.221  | 12.485   | 9    | 0.187  |
|              | SCLC                | 0.021              | 0.421   | 0.430            | 7.676  | 8    | 0.466  | 6.945    | 7    | 0.435  |
| cathepsin L2 | Overall lung cancer | -0.022             | 0.169   | 0.156            | 15.009 | 10   | 0.132  | 12.026   | 9    | 0.212  |
|              | Adenocarcinoma      | -0.010             | 0.630   | 0.452            | 9.263  | 9    | 0.413  | 8.982    | 8    | 0.344  |
|              | Squamous carcinoma  | 0.003              | 0.931   | 0.072            | 17.830 | 10   | 0.058  | 17.814   | 9    | 0.037  |
|              | SCLC                | -0.015             | 0.663   | 0.884            | 3.349  | 8    | 0.911  | 3.143    | 7    | 0.871  |
| cathepsin O  | Overall lung cancer | 0.016              | 0.227   | 0.799            | 6.806  | 10   | 0.744  | 5.127    | 9    | 0.823  |
|              | Adenocarcinoma      | 0.023              | 0.215   | 0.871            | 5.882  | 10   | 0.825  | 4.105    | 9    | 0.904  |
|              | Squamous carcinoma  | -0.001             | 0.975   | 0.855            | 6.322  | 10   | 0.788  | 6.321    | 9    | 0.707  |
|              | SCLC                | 0.013              | 0.804   | 0.212            | 8.970  | 7    | 0.255  | 8.871    | 6    | 0.181  |
| cathepsin S  | Overall lung cancer | 0.019              | 0.022   | 0.074            | 30.317 | 19   | 0.048  | 22.495   | 18   | 0.211  |
|              | Adenocarcinoma      | 0.018              | 0.066   | 0.211            | 24.987 | 20   | 0.202  | 20.805   | 19   | 0.348  |
|              | Squamous carcinoma  | 0.023              | 0.049   | 0.134            | 29.214 | 22   | 0.139  | 24.204   | 21   | 0.283  |
|              | SCLC                | 0.025              | 0.141   | 0.777            | 14.462 | 19   | 0.756  | 12.087   | 18   | 0.843  |
| cathepsin Z  | Overall lung cancer | 0.025              | 0.141   | 0.757            | 14.462 | 19   | 0.756  | 12.087   | 18   | 0.843  |
|              | Adenocarcinoma      | 0.025              | 0.141   | 0.763            | 14.462 | 19   | 0.756  | 12.087   | 18   | 0.843  |
|              | Squamous carcinoma  | 0.025              | 0.141   | 0.766            | 14.462 | 19   | 0.756  | 12.087   | 18   | 0.843  |
|              | SCLC                | 0.025              | 0.141   | 0.760            | 14.462 | 19   | 0.756  | 12.087   | 18   | 0.843  |

Supplementary Table 2. The results of reverse MR analysis of different histological of lung cancer and cathepsins family

| exposure            | outcome      | nsnp  | Inverse variance weighted |             |             | MR-Egger |             |             | Weighted median |             |             | MR-Egger intercept |         | MR-PRESSO global |        | MR-IVW |        |        | MR-Egger |        |  |
|---------------------|--------------|-------|---------------------------|-------------|-------------|----------|-------------|-------------|-----------------|-------------|-------------|--------------------|---------|------------------|--------|--------|--------|--------|----------|--------|--|
|                     |              |       | p_value                   | OR          | 95% OR      | p_value  | OR          | 95% OR      | p_value         | OR          | 95% OR      | Egger intercept    | p_value | p_value          | Q      | Q_df   | Q_pval | Q      | Q_df     | Q_pval |  |
| Overall lung cancer | Cathepsin B  | 15    | 0.352                     | 1.074       | 0.924-1.278 | 0.312    | 1.255       | 0.822-1.916 | 0.373           | 1.101       | 0.891-1.361 | -0.018             | 0.454   | 0.644            | 11.340 | 14     | 0.659  | 10.743 | 13       | 0.632  |  |
|                     | Cathepsin E  | 15    | 0.502                     | 1.058       | 0.897-1.247 | 0.600    | 1.141       | 0.705-1.846 | 0.554           | 1.070       | 0.860-1.337 | -0.009             | 0.747   | 0.262            | 16.959 | 14     | 0.258  | 16.819 | 13       | 0.208  |  |
|                     | Cathepsin F  | 15    | 0.504                     | 0.948       | 0.811-1.108 | 0.554    | 0.868       | 0.551-1.369 | 0.367           | 0.907       | 0.731-1.122 | 0.010              | 0.692   | 0.360            | 15.243 | 14     | 0.362  | 15.053 | 13       | 0.304  |  |
|                     | Cathepsin G  | 15    | 0.747                     | 1.025       | 0.880-1.194 | 0.427    | 1.201       | 0.775-1.863 | 0.710           | 1.039       | 0.848-1.272 | -0.018             | 0.463   | 0.443            | 14.572 | 14     | 0.408  | 13.957 | 13       | 0.377  |  |
|                     | Cathepsin H  | 15    | 0.447                     | 1.107       | 0.852-1.439 | 0.789    | 1.114       | 0.515-2.408 | 0.953           | 1.006       | 0.813-1.245 | -0.001             | 0.988   | 0.063            | 43.145 | 14     | 0.000  | 43.144 | 13       | 0.000  |  |
|                     | Cathepsin L2 | 15    | 0.557                     | 0.955       | 0.819-1.113 | 0.233    | 0.760       | 0.494-1.169 | 0.873           | 0.983       | 0.802-1.210 | 0.026              | 0.286   | 0.415            | 14.744 | 14     | 0.396  | 13.462 | 13       | 0.413  |  |
|                     | Cathepsin O  | 15    | 0.226                     | 1.110       | 0.937-1.316 | 0.326    | 1.291       | 0.790-2.108 | 0.460           | 1.082       | 0.877-1.336 | -0.017             | 0.532   | 0.236            | 18.003 | 14     | 0.207  | 17.449 | 13       | 0.180  |  |
|                     | Cathepsin S  | 15    | 0.325                     | 1.078       | 0.928-1.252 | 0.520    | 0.867       | 0.568-1.324 | 0.422           | 1.082       | 0.892-1.313 | 0.025              | 0.301   | 0.981            | 5.112  | 14     | 0.984  | 3.950  | 13       | 0.992  |  |
| Cathepsin Z         | 15           | 0.191 | 1.117                     | 0.947-1.317 | 0.365       | 0.807    | 0.516-1.263 | 0.284       | 1.121           | 0.909-1.383 | 0.037       | 0.152              | 0.255   | 17.102           | 14     | 0.251  | 14.521 | 13     | 0.338    |        |  |
| Adenocarcinoma      | Cathepsin B  | 14    | 0.763                     | 0.979       | 0.854-1.123 | 0.536    | 1.169       | 0.724-1.888 | 0.322           | 0.914       | 0.765-1.092 | -0.024             | 0.464   | 0.243            | 16.042 | 13     | 0.247  | 15.312 | 12       | 0.225  |  |
|                     | Cathepsin E  | 14    | 0.255                     | 1.074       | 0.950-1.215 | 0.496    | 1.164       | 0.761-1.780 | 0.150           | 1.131       | 0.956-1.338 | -0.011             | 0.705   | 0.617            | 10.781 | 13     | 0.629  | 10.631 | 12       | 0.561  |  |
|                     | Cathepsin F  | 14    | 0.495                     | 1.049       | 0.914-1.205 | 0.967    | 1.011       | 0.616-1.659 | 0.967           | 1.076       | 0.908-1.275 | 0.005              | 0.880   | 0.250            | 16.352 | 13     | 0.231  | 16.319 | 12       | 0.177  |  |
|                     | Cathepsin G  | 14    | 0.595                     | 1.034       | 0.914-1.170 | 0.158    | 1.385       | 0.906-2.118 | 0.281           | 1.089       | 0.933-1.270 | -0.040             | 0.183   | 0.712            | 9.705  | 13     | 0.718  | 7.712  | 12       | 0.807  |  |
|                     | Cathepsin H  | 14    | 0.598                     | 1.062       | 0.848-1.331 | 0.476    | 0.746       | 0.342-1.627 | 0.800           | 0.977       | 0.817-1.169 | 0.048              | 0.372   | 0.142            | 43.402 | 13     | 0.000  | 40.497 | 12       | 0.000  |  |
|                     | Cathepsin L2 | 14    | 0.184                     | 0.920       | 0.813-1.040 | 0.131    | 0.704       | 0.461-1.076 | 0.579           | 0.954       | 0.806-1.128 | 0.037              | 0.221   | 0.847            | 7.529  | 13     | 0.873  | 5.863  | 12       | 0.923  |  |
|                     | Cathepsin O  | 14    | 0.731                     | 0.979       | 0.865-1.107 | 0.117    | 0.693       | 0.454-1.060 | 0.970           | 1.003       | 0.843-1.195 | 0.047              | 0.122   | 0.417            | 12.171 | 13     | 0.514  | 9.406  | 12       | 0.668  |  |
|                     | Cathepsin S  | 14    | 0.466                     | 1.051       | 0.920-1.200 | 0.691    | 1.103       | 0.687-1.773 | 0.487           | 1.059       | 0.901-1.245 | -0.007             | 0.836   | 0.327            | 12.171 | 13     | 0.514  | 9.406  | 12       | 0.668  |  |
| Cathepsin Z         | 14           | 0.328 | 1.078                     | 0.928-1.251 | 0.260       | 0.745    | 0.456-1.215 | 0.546       | 1.057           | 0.884-1.263 | 0.051       | 0.148              | 0.125   | 12.171           | 13     | 0.514  | 9.406  | 12     | 0.668    |        |  |
| Squamous carcinoma  | Cathepsin B  | 6     | 0.033                     | 1.189       | 1.014-1.395 | 0.438    | 1.264       | 0.741-2.156 | 0.038           | 1.224       | 1.011-1.481 | -0.011             | 0.826   | 0.804            | 2.523  | 5      | 0.773  | 2.468  | 4        | 0.650  |  |
|                     | Cathepsin E  | 6     | 0.763                     | 1.032       | 0.843-1.263 | 0.325    | 0.694       | 0.366-1.315 | 0.640           | 1.055       | 0.842-1.323 | 0.074              | 0.272   | 0.172            | 8.065  | 5      | 0.153  | 5.738  | 4        | 0.220  |  |
|                     | Cathepsin F  | 6     | 0.437                     | 0.917       | 0.737-1.141 | 0.279    | 0.630       | 0.306-1.300 | 0.037           | 0.789       | 0.631-0.986 | 0.070              | 0.347   | 0.118            | 9.431  | 5      | 0.093  | 7.352  | 4        | 0.118  |  |
|                     | Cathepsin G  | 6     | 0.870                     | 1.015       | 0.846-1.219 | 0.470    | 1.296       | 0.685-2.450 | 0.967           | 0.996       | 0.813-1.220 | -0.045             | 0.476   | 0.286            | 6.590  | 5      | 0.253  | 5.708  | 4        | 0.222  |  |
|                     | Cathepsin H  | 6     | 0.758                     | 0.975       | 0.832-1.144 | 0.979    | 0.992       | 0.582-1.693 | 0.601           | 0.950       | 0.782-1.153 | -0.003             | 0.950   | 0.982            | 0.651  | 5      | 0.986  | 0.647  | 4        | 0.958  |  |
|                     | Cathepsin L2 | 6     | 0.146                     | 0.882       | 0.744-1.045 | 0.136    | 0.602       | 0.353-1.027 | 0.635           | 0.950       | 0.767-1.176 | 0.071              | 0.216   | 0.350            | 5.664  | 5      | 0.340  | 3.511  | 4        | 0.476  |  |
|                     | Cathepsin O  | 6     | 0.964                     | 1.004       | 0.842-1.197 | 0.566    | 0.820       | 0.439-1.530 | 0.979           | 1.003       | 0.805-1.250 | 0.038              | 0.541   | 0.307            | 6.072  | 5      | 0.299  | 5.464  | 4        | 0.243  |  |
|                     | Cathepsin S  | 6     | 0.678                     | 0.967       | 0.824-1.134 | 0.640    | 1.147       | 0.673-1.956 | 0.916           | 1.010       | 0.834-1.223 | -0.032             | 0.546   | 0.585            | 3.935  | 5      | 0.559  | 3.502  | 4        | 0.478  |  |
| Cathepsin Z         | 6            | 0.798 | 0.970                     | 0.770-1.222 | 0.908       | 0.947    | 0.399-2.250 | 0.512       | 0.926           | 0.736-1.165 | 0.004       | 0.957              | 0.082   | 10.524           | 5      | 0.062  | 10.515 | 4      | 0.033    |        |  |
| SCLC                | Cathepsin B  | 26    | 0.641                     | 1.017       | 0.948-1.091 | 0.156    | 1.115       | 0.964-1.291 | 0.965           | 1.002       | 0.914-1.099 | -0.024             | 0.173   | 0.293            | 28.358 | 25     | 0.292  | 26.203 | 24       | 0.343  |  |
|                     | Cathepsin E  | 26    | 0.841                     | 1.007       | 0.942-1.075 | 0.516    | 1.048       | 0.911-1.205 | 0.345           | 1.049       | 0.950-1.157 | -0.010             | 0.528   | 0.581            | 23.060 | 25     | 0.574  | 22.650 | 24       | 0.541  |  |
|                     | Cathepsin F  | 26    | 0.509                     | 1.024       | 0.954-1.100 | 0.935    | 1.006       | 0.863-1.173 | 0.457           | 1.037       | 0.942-1.141 | 0.004              | 0.802   | 0.254            | 28.986 | 25     | 0.264  | 28.909 | 24       | 0.224  |  |
|                     | Cathepsin G  | 26    | 0.897                     | 1.004       | 0.940-1.073 | 0.778    | 1.021       | 0.887-1.174 | 0.958           | 0.998       | 0.909-1.095 | -0.004             | 0.802   | 0.874            | 17.361 | 25     | 0.868  | 17.297 | 24       | 0.836  |  |
|                     | Cathepsin H  | 26    | 0.442                     | 0.973       | 0.906-1.044 | 0.761    | 0.976       | 0.838-1.138 | 0.645           | 0.977       | 0.886-1.078 | -0.001             | 0.957   | 0.259            | 28.798 | 25     | 0.272  | 28.795 | 24       | 0.228  |  |
|                     | Cathepsin L2 | 26    | 0.148                     | 1.050       | 0.983-1.122 | 0.517    | 1.048       | 0.911-1.205 | 0.470           | 1.033       | 0.946-1.127 | 0.000              | 0.977   | 0.920            | 15.533 | 25     | 0.928  | 15.532 | 24       | 0.904  |  |
|                     | Cathepsin O  | 26    | 0.367                     | 1.031       | 0.965-1.101 | 0.890    | 1.010       | 0.878-1.162 | 0.408           | 1.038       | 0.950-1.136 | 0.005              | 0.749   | 0.919            | 16.098 | 25     | 0.912  | 15.993 | 24       | 0.888  |  |
|                     | Cathepsin S  | 26    | 0.464                     | 0.972       | 0.901-1.049 | 0.253    | 0.908       | 0.772-1.067 | 0.608           | 0.976       | 0.891-1.070 | 0.018              | 0.358   | 0.116            | 33.419 | 25     | 0.121  | 32.238 | 24       | 0.121  |  |
| Cathepsin Z         | 26           | 0.798 | 0.970                     | 0.770-1.223 | 0.908       | 0.947    | 0.399-2.250 | 0.512       | 0.926           | 0.736-1.165 | 0.004       | 0.957              | 0.082   | 10.524           | 5      | 0.062  | 10.515 | 4      | 0.033    |        |  |

Supplementary Table 3. The results of multivariable MR analysis between cathepsins family and lung cancer risk.

| outcome             | exposure     | SNPs | IVW    |       |               | MR-egger |       |               | MR-IVW |        |        | MR-Egger |        |        | MR-Egger intercept |         |
|---------------------|--------------|------|--------|-------|---------------|----------|-------|---------------|--------|--------|--------|----------|--------|--------|--------------------|---------|
|                     |              |      | pvalue | OR    | 95% OR        | pvalue   | OR    | 95% OR        | Q      | Q_df   | Q_pval | Q        | Q_df   | Q_pval | Egger intercept    | p_value |
| overall lung cancer | cathepsin B  | 88   | 0.994  | 1.000 | 0.957 - 1.045 | 0.543    | 1.016 | 0.966 - 1.068 |        |        |        |          |        |        |                    |         |
|                     | cathepsin E  |      | 0.283  | 1.037 | 0.970 - 1.109 | 0.118    | 1.057 | 0.986 - 1.133 |        |        |        |          |        |        |                    |         |
|                     | cathepsin F  |      | 0.431  | 1.023 | 0.966 - 1.084 | 0.696    | 1.012 | 0.954 - 1.073 |        |        |        |          |        |        |                    |         |
|                     | cathepsin G  |      | 0.219  | 1.039 | 0.977 - 1.105 | 0.298    | 1.033 | 0.972 - 1.098 |        |        |        |          |        |        |                    |         |
|                     | cathepsin H  |      | 0.000  | 1.070 | 1.033 - 1.109 | 0.000    | 1.074 | 1.038 - 1.113 | 89.810 | 79.000 | 0.191  | 85.904   | 78.000 | 0.253  | -0.003             | 0.219   |
|                     | cathepsin O  |      | 0.419  | 0.967 | 0.892 - 1.049 | 0.231    | 0.951 | 0.877 - 1.032 |        |        |        |          |        |        |                    |         |
|                     | cathepsin S  |      | 0.725  | 1.007 | 0.968 - 1.048 | 0.760    | 1.006 | 0.967 - 1.047 |        |        |        |          |        |        |                    |         |
|                     | cathepsin L2 |      | 0.924  | 1.003 | 0.935 - 1.077 | 0.623    | 1.018 | 0.948 - 1.094 |        |        |        |          |        |        |                    |         |
|                     | cathepsin Z  |      | 0.333  | 0.976 | 0.928 - 1.025 | 0.478    | 0.982 | 0.935 - 1.032 |        |        |        |          |        |        |                    |         |
| Adenocarcinoma      | cathepsin B  | 88   | 0.982  | 1.001 | 0.944 - 1.060 | 0.402    | 1.029 | 0.963 - 1.099 |        |        |        |          |        |        |                    |         |
|                     | cathepsin E  |      | 0.488  | 1.032 | 0.944 - 1.127 | 0.267    | 1.053 | 0.961 - 1.155 |        |        |        |          |        |        |                    |         |
|                     | cathepsin F  |      | 0.680  | 1.016 | 0.941 - 1.097 | 0.999    | 1.000 | 0.926 - 1.080 |        |        |        |          |        |        |                    |         |
|                     | cathepsin G  |      | 0.152  | 1.061 | 0.978 - 1.151 | 0.189    | 1.055 | 0.974 - 1.144 |        |        |        |          |        |        |                    |         |
|                     | cathepsin H  |      | 0.000  | 1.094 | 1.046 - 1.143 | 0.000    | 1.098 | 1.050 - 1.147 | 82.350 | 79.000 | 0.376  | 78.705   | 78.000 | 0.456  | -0.005             | 0.106   |
|                     | cathepsin O  |      | 0.159  | 0.926 | 0.832 - 1.031 | 0.077    | 0.908 | 0.815 - 1.011 |        |        |        |          |        |        |                    |         |
|                     | cathepsin S  |      | 0.359  | 1.025 | 0.973 - 1.079 | 0.352    | 1.024 | 0.974 - 1.078 |        |        |        |          |        |        |                    |         |
|                     | cathepsin L2 |      | 0.513  | 1.033 | 0.937 - 1.138 | 0.317    | 1.051 | 0.954 - 1.158 |        |        |        |          |        |        |                    |         |
|                     | cathepsin Z  |      | 0.796  | 0.991 | 0.927 - 1.060 | 0.980    | 1.001 | 0.937 - 1.070 |        |        |        |          |        |        |                    |         |
| Squamous carcinoma  | cathepsin B  | 89   | 0.442  | 1.028 | 0.958 - 1.103 | 0.341    | 1.041 | 0.958 - 1.131 |        |        |        |          |        |        |                    |         |
|                     | cathepsin E  |      | 0.941  | 0.996 | 0.888 - 1.116 | 0.916    | 1.007 | 0.891 - 1.137 |        |        |        |          |        |        |                    |         |
|                     | cathepsin F  |      | 0.340  | 1.046 | 0.954 - 1.147 | 0.439    | 1.038 | 0.944 - 1.142 |        |        |        |          |        |        |                    |         |
|                     | cathepsin G  |      | 0.626  | 1.026 | 0.926 - 1.136 | 0.674    | 1.022 | 0.922 - 1.134 |        |        |        |          |        |        |                    |         |
|                     | cathepsin H  |      | 0.175  | 1.037 | 0.984 - 1.094 | 0.157    | 1.039 | 0.985 - 1.096 | 90.022 | 80.000 | 0.208  | 89.465   | 79.000 | 0.197  | -0.002             | 0.557   |
|                     | cathepsin O  |      | 0.405  | 0.947 | 0.833 - 1.076 | 0.339    | 0.938 | 0.823 - 1.070 |        |        |        |          |        |        |                    |         |
|                     | cathepsin S  |      | 0.459  | 1.023 | 0.963 - 1.087 | 0.471    | 1.023 | 0.962 - 1.087 |        |        |        |          |        |        |                    |         |
|                     | cathepsin L2 |      | 0.830  | 1.012 | 0.905 - 1.133 | 0.712    | 1.022 | 0.910 - 1.148 |        |        |        |          |        |        |                    |         |
|                     | cathepsin Z  |      | 0.561  | 0.976 | 0.901 - 1.058 | 0.636    | 0.980 | 0.903 - 1.064 |        |        |        |          |        |        |                    |         |
| SCLC                | cathepsin B  | 83   | 0.180  | 0.924 | 0.824 - 1.037 | 0.069    | 0.888 | 0.782 - 1.009 |        |        |        |          |        |        |                    |         |
|                     | cathepsin E  |      | 0.143  | 1.131 | 0.959 - 1.332 | 0.030    | 1.200 | 1.018 - 1.415 |        |        |        |          |        |        |                    |         |
|                     | cathepsin F  |      | 0.580  | 1.042 | 0.900 - 1.207 | 0.562    | 1.044 | 0.903 - 1.206 |        |        |        |          |        |        |                    |         |
|                     | cathepsin G  |      | 0.422  | 1.066 | 0.912 - 1.247 | 0.529    | 1.049 | 0.903 - 1.219 |        |        |        |          |        |        |                    |         |
|                     | cathepsin H  |      | 0.154  | 1.063 | 0.978 - 1.155 | 0.134    | 1.063 | 0.981 - 1.152 | 82.265 | 74.000 | 0.239  | 74.103   | 73.000 | 0.442  | 0.007              | 0.266   |
|                     | cathepsin O  |      | 0.365  | 1.102 | 0.893 - 1.360 | 0.434    | 1.085 | 0.884 - 1.333 |        |        |        |          |        |        |                    |         |
|                     | cathepsin S  |      | 0.422  | 1.041 | 0.943 - 1.149 | 0.395    | 1.042 | 0.948 - 1.145 |        |        |        |          |        |        |                    |         |
|                     | cathepsin L2 |      | 0.990  | 1.001 | 0.837 - 1.197 | 0.937    | 1.007 | 0.844 - 1.202 |        |        |        |          |        |        |                    |         |
|                     | cathepsin Z  |      | 0.109  | 0.900 | 0.791 - 1.024 | 0.097    | 0.899 | 0.794 - 1.019 |        |        |        |          |        |        |                    |         |
